# Supplementary material
Source: PubMed Central journal article supplement (PMC7134210)
Supplement: NIHMS1539934-supplement-3.pdf [file NIHMS1539934-supplement-3.pdf]

## Supplementary Material II: Statistical Report of Time Course Analyses using NHTS of Mixed Effects Modeling

### Chapter 1: Mixed Effects Logistic Regression

Each trial in our experimental design has categorical responses, and we have multiple repeated measures, including Time, POA and Pronunciation. Thus, we used mixed effects modeling logistic regression to analyze the data.

#### 1. Model Construction

Our data have a standard 2\*2 **within-subject** design and we measured responses over **time**, which give rise to correlated data for repeated measures: each subject was repeatedly measured at different time points under different experimental conditions (POA & Pronunciation).

Unlike the growth curve analysis where we could aggregate over all the items to reduce the random effects to conduct a by subject analysis (and vice versa) (see Chapter 2 of this supplementary material), in logistic regressions we have to consider the random effects for both *Subject* and *Item* in the **same** model. In this model, we are examining the probability of a certain subject  $i$  ( $i=1 \dots N$ ) looking at the target at a certain time point  $j$  ( $j=1 \dots J$ ) when processing the item  $k$ , ( $k=1 \dots K$ ) at a specific pronunciation condition  $l$  ( $l = 0 \& 1$ ).

In addition to that, Place of Articulation is not a fully crossed factor by item in our design, because a certain item (e.g dog) cannot be either coronal or noncoronal.

Therefore, we took all the above-mentioned features into account when construct the statistical model for our data. Using mixed effects logistic regressions (Friszmaurice, Lard & Ward, 2001), we have constructed the completely full model (i.e. the model that fully describes the structure of our data):

*For subject  $i$  at time  $j$  when processing item  $k$ ,*

#### Level 1:

$$\text{Log}(\text{Pr}(Y_{ik}=1)/1 - \text{Pr}(Y_{ik}=1))=$$

$$a_{0ik}+a_{1ik} \text{Time}_j+a_{2ik} \text{POA}_k+a_{3ik} \text{Pronunciation}_l+a_{4ik} \text{Pronunciation}_l * \text{POA}_k+a_{5ik} \text{Time}_j * \text{POA}_k+a_{6ik} \text{Time}_j * \text{Pronunciation}_l \\ +a_{7ik} * \text{Time}_j * \text{POA}_k * \text{Pronunciation}_l + \epsilon_{ik}$$

#### Level 2: We then do regressions for all the coefficients in level 1

$$a_{0ik}=\beta_0+v_{0i}+u_{0k}$$

This is the regression for the intercept coefficient.  $\beta_0$  is the intercept for the fixed effects,  $v_{0i}$  is the random intercept for subject, and  $u_{0k}$  is the random intercept for item.

$$a_{1ik}=\beta_1+v_{1i}+u_{1k}$$

This is the slope coefficient for Time.  $\beta_1$  is the slope of the fixed effects for Time,  $v_{1i}$  is the random slope of Time for subject and  $u_{1k}$  is the random slope of Time for item.

$$a_{2ik}=\beta_2+v_{2i}$$

This is the slope coefficient for POA.  $\beta_2$  is the intercept for the fixed effects of POA,  $v_{2i}$  is the random slope of POA for subject. (**Note** that we do not have the random slope for item here. This is because the POA for a specific item  $k$  (e.g. dog), is already fixed. It cannot vary between coronal and noncoronal).

$$a_{3ik} = \beta_3 + v_{3i} + u_{3ik}$$

This is the slope coefficient for Pronunciation<sub>i</sub>.  $\beta_3$  is the slope for the fixed effect of Pronunciations.  $v_{3i}$  is the random slope for subject and  $v_{3k}$  is the random slope for item. Like Time<sub>j</sub>, Pronunciation is a repeated measure for each subject and each item.)

$$a_{4ik} = \beta_4 + v_{4i}$$

This is the coefficient for Pronunciation<sub>i</sub> \* POA<sub>k</sub> interaction. For the same reason as  $a_{2i} = \beta_2 + v_{2i}$ , we do not have a random coefficient for item here.

$$a_{5ik} = \beta_5 + v_{5i}$$

This is the coefficient for Time<sub>j</sub> \* POA<sub>k</sub> interaction.  $\beta_5$  is the slope for the fixed effect for this interaction. We also do not have a random coefficient for item here.

$$a_{6ik} = \beta_6 + v_{6i} + u_{6k}$$

This is the coefficient for Time<sub>j</sub>\*Pronunciation<sub>i</sub> interaction.  $\beta_6$  is the coefficient for the fixed effect of this interaction. It is a very important coefficient for our model because we need to see whether subjects are differentiating correct and mispronunciations over time.  $v_{6i}$  is the random slope for subject and  $v_{6k}$  is the random slope for item.

$$a_{7ik} = \beta_7 + v_{7i}$$

This is the coefficient for the three way interaction.  $\beta_7$  is the coefficient for the fixed effect of this interaction. **It is the most important coefficient for our scientific question, because we need to see whether subjects are differentiating correct pronunciation and mispronunciation for different POA over time.** Similarly, we do not have a random coefficient for item here.

Plugging in level 2 to level 1, we have a complete full model as follows:

$$\begin{aligned} & \text{Log}(\text{Pr}(Y_{ij}=1)/1 - \text{Pr}(Y_{ij}=1)) = \\ & (\beta_0 + v_{0i} + u_{0k}) + (\beta_1 + v_{1i} + u_{1k})\text{Time}_j + (\beta_2 + v_{2i})\text{POA}_k + (\beta_3 + v_{3i} + u_{3k})\text{Pronunciation}_i + (\beta_4 + v_{4i})\text{Pronunciation}_i * \text{POA}_k + (\beta_5 + v_{5i})\text{Time}_j * \text{POA}_k + (\beta_6 + v_{6i} \\ & + u_{6k})\text{Time}_j * \text{Pronunciation}_i + (\beta_7 + v_{7i}) * \text{Time}_j * \text{POA}_k * \text{Pronunciation}_i + \epsilon_{ik} \end{aligned}$$

To understand our model from a different perspective, we can rearrange the model:

$$\begin{aligned} & \text{Log}(\text{Pr}(Y_{ik}=1)/1 - \text{Pr}(Y_{ik}=1)) = \\ & (\beta_0 + \beta_1\text{Time}_{ik} + \beta_2\text{POA}_k + \beta_3\text{Pronunciation}_i + \beta_4\text{Pronunciation}_i * \text{POA}_k + \beta_5\text{Time}_j * \text{POA}_k + \beta_6\text{Time}_j * \text{Pronunciation}_i \\ & + \beta_7\text{Time}_j * \text{POA}_k * \text{Pronunciation}_i) + \\ & (v_{0i} + v_{1i}\text{Time}_j + v_{2i}\text{POA}_k + v_{3i}\text{Pronunciation}_i + v_{4i}\text{Pronunciation}_i * \text{POA}_k + v_{5i}\text{Time}_j * \text{POA}_k + v_{6i}\text{Time}_j * \text{Pronunciation}_i \\ & + v_{7i}\text{Time}_j * \text{POA}_k * \text{Pronunciation}_i) + (u_{0k} + u_{1k}\text{Time}_j + u_{3k}\text{Pronunciation}_i + u_{6k}\text{Pronunciation}_i * \text{Time}_j)\epsilon_{ik}, \end{aligned}$$

The coefficients in first parenthesis on the right side of the equation are the fixed effects; and the coefficients in second parenthesis are the random effects for subject. The coefficients in the third parenthesis are the random effects for item. The last item  $\epsilon_{ik}$  is the random error term to indicate measurement noise that cannot be explained by subject or by item variations.

## II. Parameter Estimation

Now we estimate the parameters of the model using maximum likelihood estimation (MLE). This step is achieved using the SAS software. This is because in other software like the lme4 package in R, there is no option to specify the variance-covariance structure for the random effects. Now let's run the full model in SAS by specifying the compound symmetry variance-covariance structure for the random effects.

```
/*LOAD THE DATA*/
libname libref "Desktop";
proc import datafile="desktop\all.csv" out=long dbms=csv replace;
    getnames=yes;
```

```

run;
/* view the dataset*/
proc print data=long;
run;

/*Full model with random intercepts and slopes for all repeated measures and
interactions*/
PROC GLIMMIX DATA=long NOCLPRINT;
CLASS SubjID Item;
MODEL Success = POA Pronunciation Time POA*Pronunciation POA*Time Pronunciation*Time
Pronunciation*POA*Time/SOLUTION DIST=BINARY LINK=LOGIT;
RANDOM INTERCEPT POA Pronunciation Time POA*Pronunciation POA*Time Pronunciation*Time
Pronunciation*POA*Time /SUBJECT=SubjID TYPE=VC;
RANDOM INTERCEPT Pronunciation Time Pronunciation*Time /SUBJECT=Item TYPE=VC;
RUN;

```

TYPE=VS in the SAS code specifies the diagonal structure of the variance-covariance matrix. Let's see the results:

NOTE: The GLIMMIX procedure is modeling the probability that Success='0'.

NOTE: Convergence criterion (PCONV=1.11022E-8) satisfied.

NOTE: PROCEDURE GLIMMIX used (Total process time):

```

real time          3:19.02
cpu time           3:18.70

```

Here are the results for the fixed effects for each of the five experiments in the paper (we did not print out the random effects as they are not relevant to our research question and we have a lot of random effects).

### 1. Statistical Results of Experiment 1a: Infant Onset

NOTE: The GLIMMIX procedure is modeling the probability that Success='0'.

NOTE: Convergence criterion (PCONV=1.11022E-8) satisfied.

NOTE: PROCEDURE GLIMMIX used (Total process time):

```

real time          5.71 seconds
cpu time           5.54 seconds

```

| Experiment 1a: Fixed Effects for the full time window (Frame 13-100) |          |                |    |         |         |
|----------------------------------------------------------------------|----------|----------------|----|---------|---------|
| Effect                                                               | Estimate | Standard Error | DF | t Value | Pr >  t |
| Intercept                                                            | 0.9998   | 0.3739         | 12 | 2.67    | 0.0203  |
| POA                                                                  | -0.4409  | 0.5563         | 21 | -0.79   | 0.4369  |
| Pronunciation                                                        | 0.2710   | 0.5958         | 10 | 0.45    | 0.6589  |
| Time                                                                 | -0.01798 | 0.007863       | 4  | -2.29   | 0.0841  |
| POA*Pronunciation                                                    | -0.3525  | 0.8275         | 21 | -0.43   | 0.6745  |
| POA*Time                                                             | 0.005685 | 0.01144        | 21 | 0.50    | 0.6243  |
| Pronunciation*Time                                                   | -0.02048 | 0.01574        | 6  | -1.30   | 0.2409  |
| POA*Pronunciation*Time                                               | 0.009541 | 0.02219        | 13 | 0.43    | 0.6742  |

The three-way interaction is not significant. However, we also did not find a significant effect for Pronunciation and Time interaction. To further examine this result, we analyzed the time window for frame 7 to 57 (33.33 msec each time frame). This time window is selected because we leave out the first 7 frames to allow the participant to make a saccade. We cut the time window after 1060m because by this time, the participants had achieved the maximal lexical activation in all the four conditions. Now we examine the results for the limited time window:

| Experiment 1a: Fixed Effects for frame 7 to 57 |          |                |    |         |         |
|------------------------------------------------|----------|----------------|----|---------|---------|
| Effect                                         | Estimate | Standard Error | DF | t Value | Pr >  t |
| Intercept                                      | 1.7464   | 0.4957         | 12 | 3.52    | 0.0042  |
| POA                                            | -0.7127  | 0.7231         | 21 | -0.99   | 0.3356  |
| Pronunciation                                  | 0.3499   | 0.7823         | 10 | 0.45    | 0.6642  |
| Time                                           | -0.05139 | 0.01561        | 4  | -3.29   | 0.0301  |
| POA*Pronunciation                              | -0.2823  | 1.0313         | 21 | -0.27   | 0.7870  |
| POA*Time                                       | 0.01607  | 0.02199        | 21 | 0.73    | 0.4730  |
| Pronunciation*Time                             | -0.02734 | 0.03230        | 6  | -0.85   | 0.4297  |
| POA*Pronunciati*Time                           | -0.00002 | 0.04340        | 13 | -0.00   | 0.9996  |

We found a significant effect for time, indicating that participants are looking at the target object over time. However, we still failed to find a significant interaction between time and pronunciation. Unlike the prediction of underspecification, the three way interaction is not significant either for this critical time window. Therefore, for Experiment 1a, infant onset mispronunciation, we did not find evidence for underspecification.

## 2. Statistical Results of Experiment 1b: Infant Coda

NOTE: The GLIMMIX procedure is modeling the probability that Success='0'.

NOTE: Convergence criterion (PCONV=1.11022E-8) satisfied.

NOTE: PROCEDURE GLIMMIX used (Total process time):

|           |               |
|-----------|---------------|
| real time | 27.03 seconds |
| cpu time  | 25.92 seconds |

| Experiment 1b: Fixed Effects for the Full Time Window (Frame 13-100) |          |                |    |         |         |
|----------------------------------------------------------------------|----------|----------------|----|---------|---------|
| Effect                                                               | Estimate | Standard Error | DF | t Value | Pr >  t |
| Intercept                                                            | 0.7820   | 0.2697         | 12 | 2.90    | 0.0133  |
| POA                                                                  | 0.3556   | 0.3758         | 27 | 0.95    | 0.3525  |
| Pronunciation                                                        | 0.1558   | 0.4150         | 12 | 0.38    | 0.7139  |
| Time                                                                 | 0.005864 | 0.01143        | 16 | 0.51    | 0.6149  |
| POA*Pronunciation                                                    | -0.4001  | 0.6363         | 27 | -0.63   | 0.5347  |
| POA*Time                                                             | -0.03743 | 0.01265        | 25 | -2.96   | 0.0067  |
| Pronunciation*Time                                                   | 0.005953 | 0.02098        | 8  | 0.28    | 0.7838  |
| POA*Pronunciati*Time                                                 | 0.01012  | 0.02973        | 17 | 0.34    | 0.7377  |

The three way interaction is not significant. However, we did not find a significant effect for Pronunciation and Time interaction. To further examine this result, following the practice of Experiment 1a, we further analyzed the time window for frame when word activation occurred, i.e. frame 7 to 52. Results are shown below:

| Experiment 1b: Fixed Effects, frame 7-52 |          |                |    |         |         |
|------------------------------------------|----------|----------------|----|---------|---------|
| Effect                                   | Estimate | Standard Error | DF | t Value | Pr >  t |
| Intercept                                | 1.2303   | 0.5334         | 12 | 2.31    | 0.0397  |
| POA                                      | 1.4308   | 0.7457         | 27 | 1.92    | 0.0656  |
| Pronunciation                            | 2.4242   | 0.9206         | 12 | 2.63    | 0.0218  |
| Time                                     | -0.03545 | 0.01741        | 16 | -2.04   | 0.0586  |
| POA*Pronunciation                        | -2.6151  | 1.4757         | 27 | -1.77   | 0.0877  |
| POA*Time                                 | -0.04039 | 0.02384        | 25 | -1.69   | 0.1027  |

|                               |          |         |    |       |        |
|-------------------------------|----------|---------|----|-------|--------|
| <b>Pronunciation*Time</b>     | -0.05110 | 0.03568 | 8  | -1.43 | 0.1899 |
| <b>POA*Pronunciation*Time</b> | 0.02951  | 0.05822 | 17 | 0.51  | 0.6187 |

A significant effect of Time is found for this time window when word activation occurred, suggesting that participants changed their fixation to the target object over time. We also found a marginally significant effect for the interaction of time and pronunciation, suggesting that participants differentiated between the correct and the mispronounced words over time. However, consistent with our previous analyses, the three-way interaction is not significant, suggesting that participants' fixation to target object was not contingent upon the place of articulation of the word labels of the target object.

### 3. Statistical Results of Experiment 2a: Adult Onset with Salient Phase Included

We conduct the analyses for the full time window with frame 1 to frame 100 (1667ms) using the same SAS code. Results for the fixed effects are shown below:

| Experiment 2a: Fixed Effects for the Full Time Window (Frame 13-100) |          |                |    |         |         |
|----------------------------------------------------------------------|----------|----------------|----|---------|---------|
| Effect                                                               | Estimate | Standard Error | DF | t Value | Pr >  t |
| <b>Intercept</b>                                                     | 1.6509   | 0.2024         | 31 | 8.16    | <.0001  |
| <b>POA</b>                                                           | 0.1910   | 0.1677         | 31 | 1.14    | 0.2634  |
| <b>Pronunciation</b>                                                 | -0.3156  | 0.1657         | 31 | -1.90   | 0.0661  |
| <b>Time</b>                                                          | -0.02275 | 0.003971       | 31 | -5.73   | <.0001  |
| <b>POA*Pronunciation</b>                                             | -0.1777  | 0.2265         | 31 | -0.78   | 0.4387  |
| <b>POA*Time</b>                                                      | -0.00459 | 0.003284       | 31 | -1.40   | 0.1722  |
| <b>Pronunciation*Time</b>                                            | -0.00246 | 0.003966       | 31 | -0.62   | 0.5388  |
| <b>POA*Pronunciation*Time</b>                                        | 0.006842 | 0.004107       | 23 | 1.67    | 0.1093  |

Like Experiment 1, the three-way interaction is not significant. Also, we did not find a significant effect for Pronunciation and Time interaction. To further examine this result, following the practice of Experiment 1, we further analyzed the time window for frame 13-61 when word activation occurred in this experiment.

| Experiment 2a: Fixed Effects for Time Window 13-61 |          |                |    |         |         |
|----------------------------------------------------|----------|----------------|----|---------|---------|
| Effect                                             | Estimate | Standard Error | DF | t Value | Pr >  t |
| <b>Intercept</b>                                   | 1.6903   | 0.4099         | 31 | 4.12    | 0.0003  |
| <b>POA</b>                                         | 0.1572   | 0.4146         | 31 | 0.38    | 0.7070  |
| <b>Pronunciation</b>                               | 0.4059   | 0.3502         | 31 | 1.16    | 0.2554  |
| <b>Time</b>                                        | -0.02963 | 0.01115        | 31 | -2.66   | 0.0123  |
| <b>POA*Pronunciation</b>                           | -0.5592  | 0.4742         | 31 | -1.18   | 0.2473  |
| <b>POA*Time</b>                                    | -0.00162 | 0.01021        | 31 | -0.16   | 0.8753  |
| <b>Pronunciation*Time</b>                          | -0.02738 | 0.01053        | 31 | -2.60   | 0.0142  |
| <b>POA*Pronunciation*Time</b>                      | 0.01330  | 0.01239        | 23 | 1.07    | 0.2945  |

The results are similar as Experiment 1b. Over time, participants significantly differentiated correct pronunciations and mispronunciations. However, the coefficients for Time \* POA \* Pronunciation suggests that the effect of

mispronunciation does not differ for different place of articulation conditions over time. Such results are consistent with our previous analyses.

#### 4. Statistical Results of Experiment 2b: Adult Coda

Using the same model, we analyzed the adult coda data. As previously, we first analyzed the full time course, i.e. the first 100 frame (1667ms). Results for the fixed effects are shown below:

| Experiment 2b: Fixed Effects for the full time window (Frame 13-100) |          |                |    |         |         |
|----------------------------------------------------------------------|----------|----------------|----|---------|---------|
| Effect                                                               | Estimate | Standard Error | DF | t Value | Pr >  t |
| Intercept                                                            | 2.5614   | 0.3193         | 29 | 8.02    | <.0001  |
| POA                                                                  | 0.4025   | 0.3640         | 29 | 1.11    | 0.2779  |
| Pronunciation                                                        | 0.7020   | 0.3446         | 29 | 2.04    | 0.0508  |
| Time                                                                 | -0.03760 | 0.005128       | 29 | -7.33   | <.0001  |
| POA*Pronunciation                                                    | -0.2889  | 0.4616         | 29 | -0.63   | 0.5363  |
| POA*Time                                                             | -0.00151 | 0.006515       | 29 | -0.23   | 0.8184  |
| Pronunciation*Time                                                   | -0.03264 | 0.007776       | 29 | -4.20   | 0.0002  |
| POA*Pronunciation*Time                                               | 0.01006  | 0.009991       | 21 | 1.01    | 0.3256  |

Like the previously reported experiments, the three way interaction is not significant. Like Experiment 1b, we also found a significant effect for Pronunciation and Time interaction. Therefore, our findings for the full time frame of the coda experiment did not support underspecification. As not until frame 100 did subjects achieve the maximal fixation for all conditions in this experiment, no further time window is analyzed.

#### 5. Statistical Results of Experiment 3: Adult Onset with Carrier Phase Removed

| Experiment 3 Adult Onset (Time 13-100) |          |                |    |         |         |
|----------------------------------------|----------|----------------|----|---------|---------|
| Effect                                 | Estimate | Standard Error | DF | t Value | Pr >  t |
| Intercept                              | 1.8733   | 0.2747         | 24 | 6.82    | <.0001  |
| POA                                    | 0.1453   | 0.1857         | 24 | 0.78    | 0.4415  |
| Pronunciation                          | 0.1274   | 0.2296         | 24 | 0.55    | 0.5841  |
| Time                                   | -0.03066 | 0.006256       | 24 | -4.90   | <.0001  |
| POA*Pronunciation                      | -0.1917  | 0.1833         | 24 | -1.05   | 0.3060  |
| POA*Time                               | 0.000726 | 0.003609       | 24 | 0.20    | 0.8423  |
| Pronunciation*Time                     | -0.01946 | 0.006212       | 24 | -3.13   | 0.0045  |
| POA*Pronunciation*Time                 | 0.003302 | 0.004582       | 16 | 0.72    | 0.4815  |

With the entire 100 frames (i.e. 1667ms) included, we found a significant effect for Pronunciation over time, as suggested by Pronunciation \* interaction, indicating that our data are valid because subjects were performing the task. Also, similar as previous experiments and the Bayesian analyses, there is no significant three-way interaction.

Now we follow the previous practice and limit the time window to the time frames where lexical activation occurred in this experiment:

| Experiment 3 Fixed Effects (Time 13-64) |          |                |    |         |         |
|-----------------------------------------|----------|----------------|----|---------|---------|
| Effect                                  | Estimate | Standard Error | DF | t Value | Pr >  t |
| <b>Intercept</b>                        | 2.3061   | 0.5062         | 24 | 4.56    | 0.0001  |
| <b>POA</b>                              | -0.2701  | 0.5247         | 24 | -0.51   | 0.6115  |
| <b>Pronunciation</b>                    | 0.7665   | 0.3557         | 24 | 2.15    | 0.0414  |
| <b>Time</b>                             | -0.04826 | 0.01086        | 24 | -4.44   | 0.0002  |
| <b>POA*Pronunciation</b>                | 0.3781   | 0.4382         | 24 | 0.86    | 0.3968  |
| <b>POA*Time</b>                         | 0.01294  | 0.01204        | 24 | 1.08    | 0.2930  |
| <b>Pronunciation*Time</b>               | -0.04085 | 0.009879       | 24 | -4.13   | 0.0004  |
| <b>POA*Pronunciati*Time</b>             | -0.01294 | 0.01221        | 16 | -1.06   | 0.3049  |

The results are similar as before. Over time, participants significantly differentiated correct pronunciations and mispronunciations. However, if we look at the coefficients for Time \* POA \* Pronunciation, we will be able to see that the effect of mispronunciation does not differ for different place of articulation conditions over time.

## 6. Conclusion

We found that Significant effect for pronunciation over time but no three-way interaction for the time frame when word activation occurs. Thus, similar as our results from Bayesian Model Comparison, findings using Logistic Mixed Effects modeling at least suggested that for our data, the psycholinguistic prediction for underspecification does not hold true.
