# Supplementary material
Source: PubMed Central journal article supplement (PMC7134210)
Supplement: NIHMS1539934-supplement-4.pdf [file NIHMS1539934-supplement-4.pdf]

SUPPLIMENTARY MATERIALS

I. Visual stimulus pairings to in Experiment 2a

| Target Name | Familiar                                                                            | Unfamiliar                                                                           |
|-------------|-------------------------------------------------------------------------------------|--------------------------------------------------------------------------------------|
| dove        |    |    |
| donkey      |   |   |
| diver       |  |  |

|                |                                                                                     |                                                                                      |
|----------------|-------------------------------------------------------------------------------------|--------------------------------------------------------------------------------------|
| <p>dome</p>    |    |   |
| <p>diamond</p> |   |  |
| <p>dolphin</p> |  |  |

|               |                                                                                     |                                                                                      |
|---------------|-------------------------------------------------------------------------------------|--------------------------------------------------------------------------------------|
| <p>dipper</p> |    |    |
| <p>doctor</p> |   |   |
| <p>dish</p>   |  |  |

|               |                                                                                     |                                                                                      |
|---------------|-------------------------------------------------------------------------------------|--------------------------------------------------------------------------------------|
| <p>dice</p>   |    |    |
| <p>diary</p>  |   |   |
| <p>desert</p> |  |  |

|             |                                                                                     |                                                                                      |
|-------------|-------------------------------------------------------------------------------------|--------------------------------------------------------------------------------------|
| <p>desk</p> |    |    |
| <p>disk</p> |   |   |
| <p>duck</p> |  |  |

|               |                                                                                     |                                                                                      |
|---------------|-------------------------------------------------------------------------------------|--------------------------------------------------------------------------------------|
| <p>diaper</p> |    |    |
| <p>daisy</p>  |   |   |
| <p>donut</p>  |  |  |

|             |                                                                                     |                                                                                      |
|-------------|-------------------------------------------------------------------------------------|--------------------------------------------------------------------------------------|
| <p>toe</p>  |    |    |
| <p>TV</p>   |   |   |
| <p>tent</p> |  |  |

|               |                                                                                     |                                                                                      |
|---------------|-------------------------------------------------------------------------------------|--------------------------------------------------------------------------------------|
| <p>tank</p>   |    |    |
| <p>ticket</p> |   |   |
| <p>tissue</p> |  |  |



|              |                                                                                     |                                                                                      |
|--------------|-------------------------------------------------------------------------------------|--------------------------------------------------------------------------------------|
| <p>tower</p> |    |    |
| <p>tail</p>  |   |   |
| <p>taxi</p>  |  |  |

|                |                                                                                     |                                                                                      |
|----------------|-------------------------------------------------------------------------------------|--------------------------------------------------------------------------------------|
| <p>toilet</p>  |    |    |
| <p>tadpole</p> |   |   |
| <p>tie</p>     |  |  |

|               |                                                                                     |                                                                                      |
|---------------|-------------------------------------------------------------------------------------|--------------------------------------------------------------------------------------|
| <p>turkey</p> |    |    |
| <p>tape</p>   |   |   |
| <p>turtle</p> |  |  |

|              |                                                                                     |                                                                                      |
|--------------|-------------------------------------------------------------------------------------|--------------------------------------------------------------------------------------|
| <p>table</p> |    |    |
| <p>tiger</p> |   |   |
| <p>toad</p>  |  |  |

|              |                                                                                     |                                                                                      |
|--------------|-------------------------------------------------------------------------------------|--------------------------------------------------------------------------------------|
| <p>bench</p> |    |    |
| <p>boat</p>  |   |   |
| <p>bone</p>  |  |  |

|             |                                                                                     |                                                                                      |
|-------------|-------------------------------------------------------------------------------------|--------------------------------------------------------------------------------------|
| <p>bowl</p> |    |    |
| <p>boy</p>  |   |   |
| <p>book</p> |  |  |

|             |                                                                                     |                                                                                      |
|-------------|-------------------------------------------------------------------------------------|--------------------------------------------------------------------------------------|
| <p>box</p>  |    |    |
| <p>bath</p> |   |   |
| <p>bird</p> |  |  |

|             |                                                                                     |                                                                                      |
|-------------|-------------------------------------------------------------------------------------|--------------------------------------------------------------------------------------|
| <p>bat</p>  |    |    |
| <p>boot</p> |   |   |
| <p>bus</p>  |  |  |



|               |                                                                                     |                                                                                      |
|---------------|-------------------------------------------------------------------------------------|--------------------------------------------------------------------------------------|
| <p>coach</p>  |    |    |
| <p>cotton</p> |   |   |
| <p>couch</p>  |  |  |

|               |                                                                                     |                                                                                      |
|---------------|-------------------------------------------------------------------------------------|--------------------------------------------------------------------------------------|
| <p>cage</p>   |    |    |
| <p>cougar</p> |   |   |
| <p>keg</p>    |  |  |

|                |                                                                                     |                                                                                      |
|----------------|-------------------------------------------------------------------------------------|--------------------------------------------------------------------------------------|
| <p>cushion</p> |    |    |
| <p>Curtain</p> |   |   |
| <p>kettle</p>  |  |  |

|              |                                                                                     |                                                                                      |
|--------------|-------------------------------------------------------------------------------------|--------------------------------------------------------------------------------------|
| <p>camel</p> |    |    |
| <p>canoe</p> |   |   |
| <p>candy</p> |  |  |

|              |                                                                                     |                                                                                      |
|--------------|-------------------------------------------------------------------------------------|--------------------------------------------------------------------------------------|
| <p>pear</p>  | 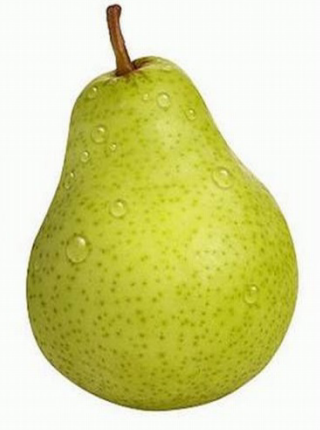   |    |
| <p>pasta</p> |   |   |
| <p>pizza</p> |  |  |

|               |                                                                                     |                                                                                      |
|---------------|-------------------------------------------------------------------------------------|--------------------------------------------------------------------------------------|
| <p>piano</p>  |    |    |
| <p>pencil</p> |   |   |
| <p>parrot</p> |  |  |

|              |                                                                                     |                                                                                      |
|--------------|-------------------------------------------------------------------------------------|--------------------------------------------------------------------------------------|
| <p>girl</p>  |    |    |
| <p>gift</p>  |   |   |
| <p>goose</p> |  |  |

|               |                                                                                     |                                                                                      |
|---------------|-------------------------------------------------------------------------------------|--------------------------------------------------------------------------------------|
| <p>garlic</p> |    |    |
| <p>ghost</p>  |   |   |
| <p>garden</p> |  |  |



|              |                                                                                     |                                                                                      |
|--------------|-------------------------------------------------------------------------------------|--------------------------------------------------------------------------------------|
| <p>ear</p>   |    |    |
| <p>fan</p>   |   |   |
| <p>spoon</p> |  |  |

|             |                                                                                     |                                                                                      |
|-------------|-------------------------------------------------------------------------------------|--------------------------------------------------------------------------------------|
| <p>tree</p> |    |    |
| <p>hand</p> |   |   |
| <p>hat</p>  |  |  |

|              |                                                                                     |                                                                                      |
|--------------|-------------------------------------------------------------------------------------|--------------------------------------------------------------------------------------|
| <p>bread</p> |    |    |
| <p>flag</p>  |   |   |
| <p>foot</p>  |  |  |

|               |                                                                                     |                                                                                      |
|---------------|-------------------------------------------------------------------------------------|--------------------------------------------------------------------------------------|
| <p>ladder</p> |    |    |
| <p>fox</p>    |   |   |
| <p>guitar</p> |  |  |

|              |                                                                                     |                                                                                      |
|--------------|-------------------------------------------------------------------------------------|--------------------------------------------------------------------------------------|
| <p>comb</p>  |    |    |
| <p>mango</p> |   |   |
| <p>pen</p>   |  |  |

|              |                                                                                     |                                                                                      |
|--------------|-------------------------------------------------------------------------------------|--------------------------------------------------------------------------------------|
| <p>vase</p>  |    |    |
| <p>wine</p>  |   |   |
| <p>watch</p> |  |  |

|                |                                                                                     |                                                                                      |
|----------------|-------------------------------------------------------------------------------------|--------------------------------------------------------------------------------------|
| <p>bermate</p> |    |    |
| <p>dalok</p>   |   |   |
| <p>dwatch</p>  |  |  |

|                |                                                                                     |                                                                                      |
|----------------|-------------------------------------------------------------------------------------|--------------------------------------------------------------------------------------|
| <p>golpsle</p> |    |    |
| <p>gomtox</p>  |   |   |
| <p>boupet</p>  |  |  |



|               |                                                                                     |                                                                                      |
|---------------|-------------------------------------------------------------------------------------|--------------------------------------------------------------------------------------|
| <p>lepter</p> | 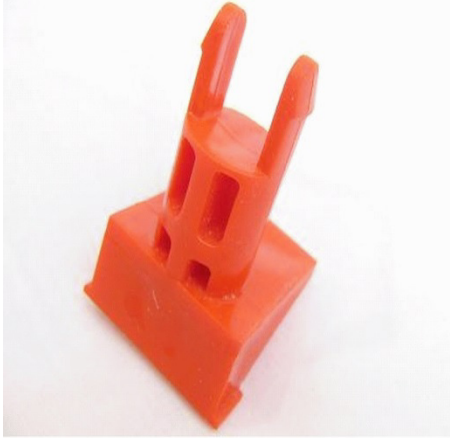   |    |
| <p>nando</p>  |   |   |
| <p>nescot</p> |  |  |

|               |                                                                                     |                                                                                      |
|---------------|-------------------------------------------------------------------------------------|--------------------------------------------------------------------------------------|
| <p>quish</p>  |    |    |
| <p>fansel</p> |   |   |
| <p>fapton</p> |  |  |

|              |                                                                                                                                                                     |                                                                                                                                                                                        |
|--------------|---------------------------------------------------------------------------------------------------------------------------------------------------------------------|----------------------------------------------------------------------------------------------------------------------------------------------------------------------------------------|
| <p>holek</p> |  A yellow plastic peeler with a curved handle and a black grating surface.         |  A side view of a striped fish, possibly a sea bream, with dark vertical stripes on its silver body. |
| <p>stipe</p> |  A metal nut and a matching metal washer with a serrated edge.                    |  A black wok with a long handle, shown from a top-down perspective.                                 |
| <p>swike</p> |  A small, orange, textured object with a vertical ribbed stem and a flared base. |  A close-up of a vibrant red rose with green leaves and a stem.                                    |

|                |                                                                                     |                                                                                      |
|----------------|-------------------------------------------------------------------------------------|--------------------------------------------------------------------------------------|
| <p>topal</p>   |    |    |
| <p>twipter</p> |   |   |
| <p>suple</p>   |  |  |

II. Visual stimulus pairing to conditions in Experiment 2b

Part B: Visual Stimulus Pairs

| Target Names | Familiar                                                                            | Unfamiliar                                                                           |
|--------------|-------------------------------------------------------------------------------------|--------------------------------------------------------------------------------------|
| bed          |    |    |
| bread        |   |   |
| beard        |  |  |

|             |                                                                                     |                                                                                      |
|-------------|-------------------------------------------------------------------------------------|--------------------------------------------------------------------------------------|
| <p>bird</p> |    |    |
| <p>food</p> |   |   |
| <p>mold</p> |  |  |

|              |                                                                                     |                                                                                      |
|--------------|-------------------------------------------------------------------------------------|--------------------------------------------------------------------------------------|
| <p>head</p>  |    |    |
| <p>spade</p> |   |   |
| <p>cloud</p> |  |  |

|              |                                                                                     |                                                                                      |
|--------------|-------------------------------------------------------------------------------------|--------------------------------------------------------------------------------------|
| <p>bud</p>   |    |    |
| <p>blade</p> |   |   |
| <p>mud</p>   |  |  |



|              |                                                                                                                                                                                                                                                                           |                                                                                                                                                                                                                                                                                                        |
|--------------|---------------------------------------------------------------------------------------------------------------------------------------------------------------------------------------------------------------------------------------------------------------------------|--------------------------------------------------------------------------------------------------------------------------------------------------------------------------------------------------------------------------------------------------------------------------------------------------------|
| <p>gold</p>  |  Three gold bars are shown, one in the foreground and two behind it, all rendered in a bright, metallic yellow color with a slight shadow.                                               |  A single, smooth, black oval pill is shown against a white background. It has a small, circular embossed mark in the center.                                                                                        |
| <p>blood</p> |  A close-up of a human fingertip is shown. A single, bright red drop of blood is falling from the tip of the finger.                                                                    |  A highly ornate, multi-tiered brooch or pendant is shown. It is covered in intricate details, including what appears to be a large, clear gemstone at the top and various smaller stones and metalwork throughout. |
| <p>slide</p> |  A simple cartoon illustration of a slide. The slide itself is a light blue color, and the ladder on the left is a darker blue. The entire drawing is done in a simple, sketchy style. |  A dark, shadowy creature with glowing yellow eyes is shown. The creature has a hunched, somewhat grotesque appearance with visible claws and a tail-like structure at the bottom.                                 |

|               |                                                                                     |                                                                                      |
|---------------|-------------------------------------------------------------------------------------|--------------------------------------------------------------------------------------|
| <p>thread</p> |    |    |
| <p>sword</p>  |   |   |
| <p>crowd</p>  |  |  |

|             |                                                                                     |                                                                                      |
|-------------|-------------------------------------------------------------------------------------|--------------------------------------------------------------------------------------|
| <p>cat</p>  |    |    |
| <p>boot</p> |   |   |
| <p>foot</p> |  |  |

|             |                                                                                     |                                                                                      |
|-------------|-------------------------------------------------------------------------------------|--------------------------------------------------------------------------------------|
| <p>boat</p> |    |    |
| <p>goat</p> |   |   |
| <p>suit</p> |  |  |

|              |                                                                                     |                                                                                      |
|--------------|-------------------------------------------------------------------------------------|--------------------------------------------------------------------------------------|
| <p>jet</p>   |    |    |
| <p>fruit</p> |   |   |
| <p>root</p>  |  |  |

|               |                                                                                     |                                                                                      |
|---------------|-------------------------------------------------------------------------------------|--------------------------------------------------------------------------------------|
| <p>scout</p>  |    |    |
| <p>knight</p> |   |   |
| <p>nut</p>    |  |  |

|              |                                                                                     |                                                                                      |
|--------------|-------------------------------------------------------------------------------------|--------------------------------------------------------------------------------------|
| <p>net</p>   |    |    |
| <p>flute</p> |   |   |
| <p>light</p> |  |  |

|               |                                                                                     |                                                                                      |
|---------------|-------------------------------------------------------------------------------------|--------------------------------------------------------------------------------------|
| <p>gut</p>    |    |    |
| <p>sprout</p> |   |   |
| <p>skate</p>  |  |  |



|              |                                                                                     |                                                                                      |
|--------------|-------------------------------------------------------------------------------------|--------------------------------------------------------------------------------------|
| <p>crib</p>  |    |    |
| <p>crab</p>  |   |   |
| <p>shrub</p> |  |  |

|              |                                                                                     |                                                                                      |
|--------------|-------------------------------------------------------------------------------------|--------------------------------------------------------------------------------------|
| <p>orb</p>   |    |    |
| <p>probe</p> |   |   |
| <p>club</p>  |  |  |

|             |                                                                                     |                                                                                      |
|-------------|-------------------------------------------------------------------------------------|--------------------------------------------------------------------------------------|
| <p>tube</p> |    |    |
| <p>tub</p>  |   |   |
| <p>swab</p> |  |  |

|             |                                                                                                                                                                 |                                                                                                                                                                                                     |
|-------------|-----------------------------------------------------------------------------------------------------------------------------------------------------------------|-----------------------------------------------------------------------------------------------------------------------------------------------------------------------------------------------------|
| <p>flag</p> |  A photograph of the United States flag, showing the stars and stripes waving. |  A photograph of a yellow, devil-like creature with horns and a wide, toothy grin, set against a dark background. |
| <p>pig</p>  |  A photograph of a chocolate pig, a confectionery item shaped like a pig.     |  A cartoon illustration of a pink pig with a smiling face and a curly tail.                                      |
| <p>plug</p> |  A photograph of a black electrical plug with two silver prongs.             |  A photograph of a complex, grey mechanical plug or connector with various holes and a circular ring.           |

|             |                                                                                     |                                                                                      |
|-------------|-------------------------------------------------------------------------------------|--------------------------------------------------------------------------------------|
| <p>frog</p> |    |    |
| <p>dog</p>  |   |   |
| <p>keg</p>  |  |  |

|             |                                                                                     |                                                                                      |
|-------------|-------------------------------------------------------------------------------------|--------------------------------------------------------------------------------------|
| <p>fig</p>  |    |    |
| <p>crag</p> |   |   |
| <p>drug</p> |  |  |

|              |                                                                                     |                                                                                      |
|--------------|-------------------------------------------------------------------------------------|--------------------------------------------------------------------------------------|
| <p>book</p>  |    |    |
| <p>snake</p> |   |   |
| <p>truck</p> |  |  |

|              |                                                                                     |                                                                                      |
|--------------|-------------------------------------------------------------------------------------|--------------------------------------------------------------------------------------|
| <p>clerk</p> |    |    |
| <p>stick</p> |   |   |
| <p>elk</p>   |  |  |



|              |                                                                                     |                                                                                      |
|--------------|-------------------------------------------------------------------------------------|--------------------------------------------------------------------------------------|
| <p>stork</p> | 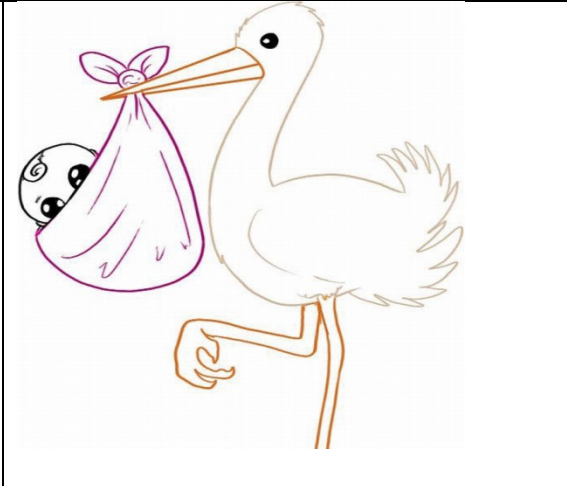   |    |
| <p>crock</p> |   |   |
| <p>yolk</p>  |  |  |

|              |                                                                                     |                                                                                       |
|--------------|-------------------------------------------------------------------------------------|---------------------------------------------------------------------------------------|
| <p>soap</p>  |    |     |
| <p>scope</p> |   |    |
| <p>tape</p>  |  |  |

|              |                                                                                     |                                                                                      |
|--------------|-------------------------------------------------------------------------------------|--------------------------------------------------------------------------------------|
| <p>scalp</p> | 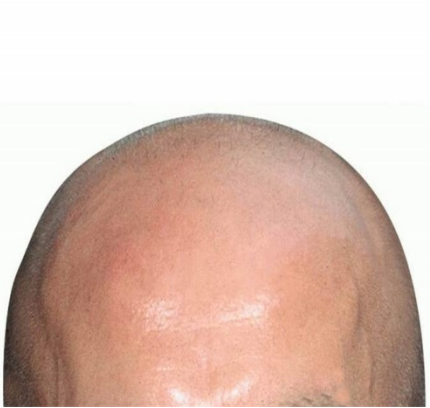   |    |
| <p>drop</p>  |   |   |
| <p>jeep</p>  |  |  |

|              |                                                                                     |                                                                                      |
|--------------|-------------------------------------------------------------------------------------|--------------------------------------------------------------------------------------|
| <p>strap</p> |    |    |
| <p>chop</p>  |   |   |
| <p>pope</p>  |  |  |

|              |                                                                                     |                                                                                      |
|--------------|-------------------------------------------------------------------------------------|--------------------------------------------------------------------------------------|
| <p>gun</p>   |    |    |
| <p>hand</p>  |   |   |
| <p>apple</p> |  |  |

|               |                                                                                     |                                                                                      |
|---------------|-------------------------------------------------------------------------------------|--------------------------------------------------------------------------------------|
| <p>ear</p>    |    |    |
| <p>cheese</p> |   |   |
| <p>cream</p>  |  |  |

|             |                                                                                     |                                                                                      |
|-------------|-------------------------------------------------------------------------------------|--------------------------------------------------------------------------------------|
| <p>door</p> |    |    |
| <p>pen</p>  |   |   |
| <p>nose</p> |  |  |

|              |                                                                                                                                                                                      |                                                                                                                                                                                                               |
|--------------|--------------------------------------------------------------------------------------------------------------------------------------------------------------------------------------|---------------------------------------------------------------------------------------------------------------------------------------------------------------------------------------------------------------|
| <p>mouse</p> |  A photograph of a small brown mouse with a long tail, standing on a white background.              |  A photograph of a white computer mouse with a scroll wheel and buttons, shown from a top-down perspective.                 |
| <p>wolf</p>  |  A photograph of a grey and brown wolf sitting in a snowy environment, looking towards the camera. |  A photograph of a red plastic component, possibly a part of a machine, with a complex shape and a handle-like structure. |
| <p>hat</p>   |  A photograph of a black, ribbed hat with a wide brim, shown from a top-down perspective.         |  A photograph of a silver metal handle with a textured surface and a curved shape, shown from a top-down perspective.     |



|              |                                                                                     |                                                                                      |
|--------------|-------------------------------------------------------------------------------------|--------------------------------------------------------------------------------------|
| <p>peach</p> |    |    |
| <p>clock</p> |   |   |
| <p>grape</p> |  |  |

|              |                                                                                     |                                                                                      |
|--------------|-------------------------------------------------------------------------------------|--------------------------------------------------------------------------------------|
| <p>mouth</p> |    |    |
| <p>fish</p>  |   |   |
| <p>brush</p> |  |  |

|              |                                                                                     |                                                                                      |
|--------------|-------------------------------------------------------------------------------------|--------------------------------------------------------------------------------------|
| <p>shrok</p> |    |    |
| <p>klup</p>  |   |   |
| <p>ralk</p>  |  |  |

|               |                                                                                     |                                                                                      |
|---------------|-------------------------------------------------------------------------------------|--------------------------------------------------------------------------------------|
| <p>blerm</p>  |    |    |
| <p>dalp</p>   |   |   |
| <p>dwatch</p> |  |  |

|              |                                                                                     |                                                                                      |
|--------------|-------------------------------------------------------------------------------------|--------------------------------------------------------------------------------------|
| <p>slem</p>  |    |    |
| <p>prack</p> |   |   |
| <p>pruse</p> |  |  |

|              |                                                                                     |                                                                                      |
|--------------|-------------------------------------------------------------------------------------|--------------------------------------------------------------------------------------|
| <p>troge</p> |    |    |
| <p>gompt</p> |   |   |
| <p>plaft</p> |  |  |

|              |                                                                                     |                                                                                      |
|--------------|-------------------------------------------------------------------------------------|--------------------------------------------------------------------------------------|
| <p>slopt</p> | 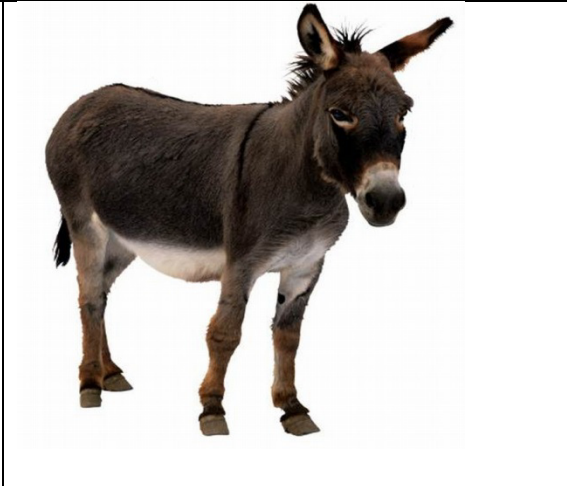   |    |
| <p>laust</p> |   |   |
| <p>drept</p> |  |  |

|               |                                                                                     |                                                                                      |
|---------------|-------------------------------------------------------------------------------------|--------------------------------------------------------------------------------------|
| <p>monge</p>  |    |    |
| <p>nelp</p>   |   |   |
| <p>thraft</p> |  |  |
